# Supplementary material for: Abrogation of FGFR signaling blocks β-catenin–induced adrenocortical hyperplasia and aldosterone production
Source: JCI journal article supplement (doi:10.1172/jci.insight.184863), 2025-09-16
Supplement: sd1 [file 1]

# Supplemental Figure 1

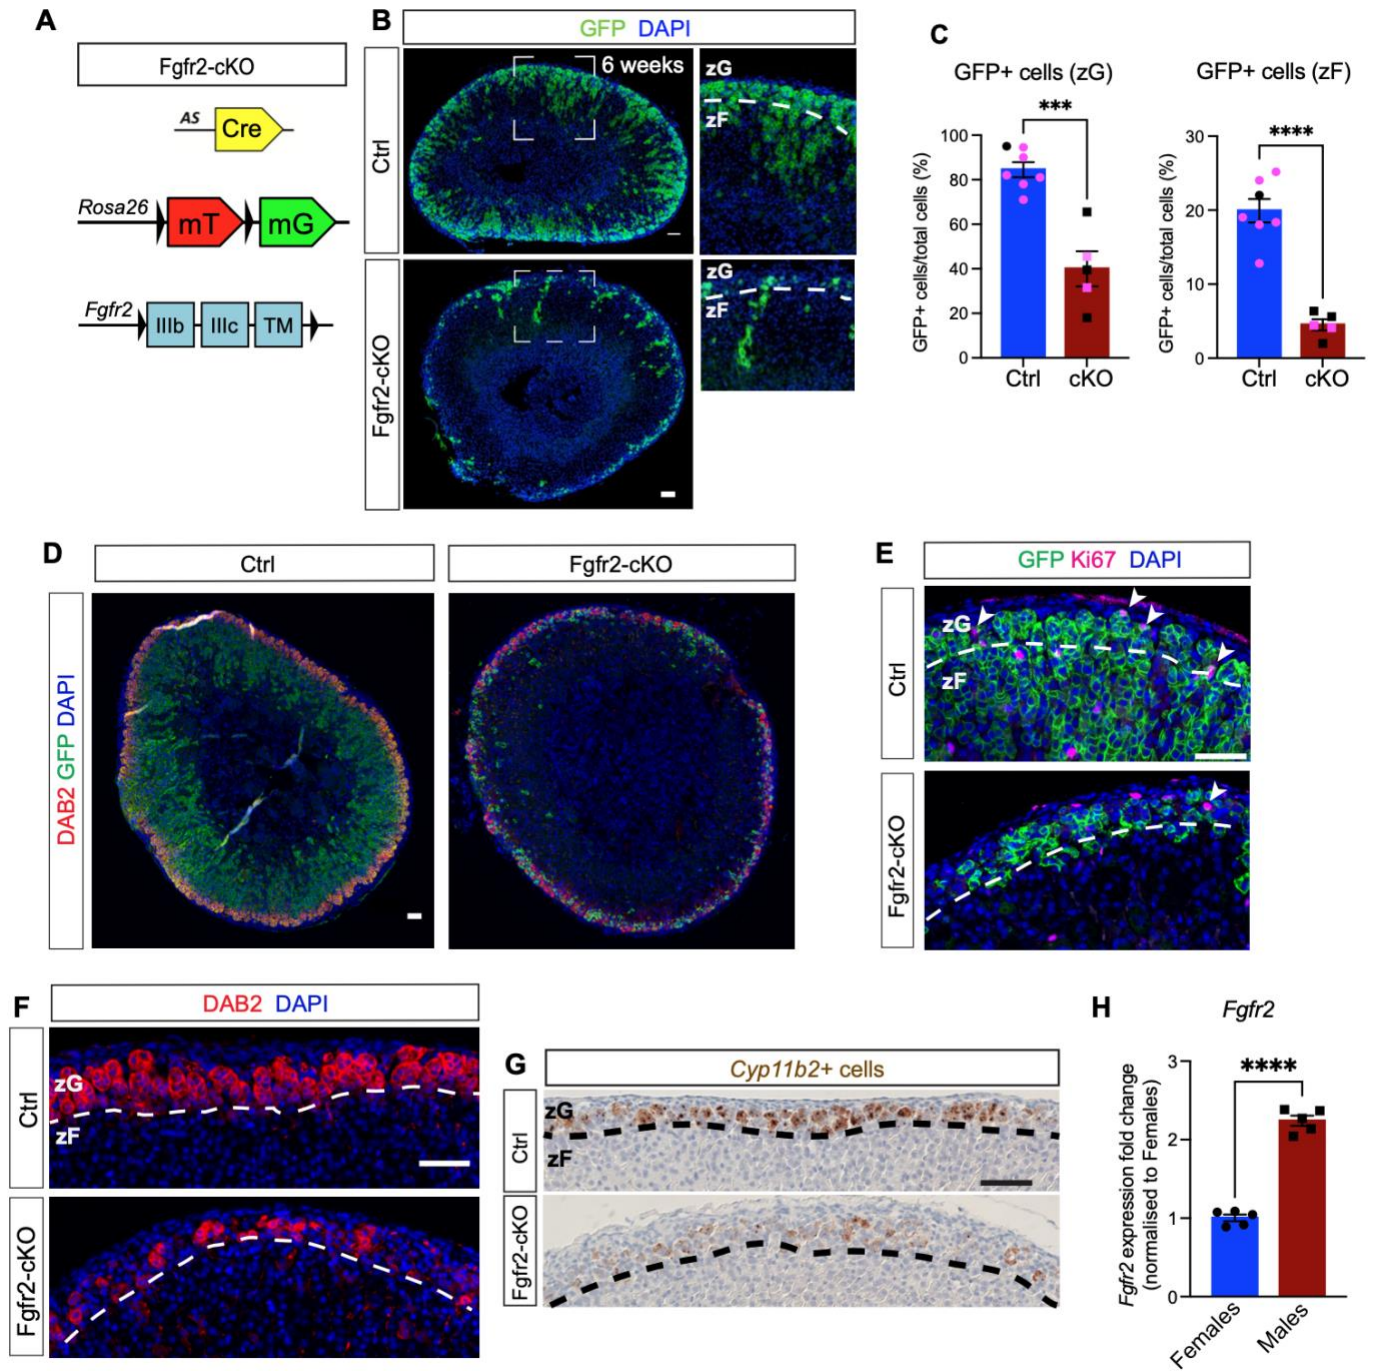

**Supplemental Figure 1 (Supplemental to Figure 1): Constitutive *Fgfr2* knock-out (*Fgfr2*-cKO) impairs zG cell identity and transdifferentiation.** (A) Schematic of the *Fgfr2*-cKO ( $AS^{Cre/+};Fgfr2^{fl/fl};R26R^{mTmG/+}$ ) model. (B) Lineage-tracing by immunofluorescence for GFP+ cells in adrenals from 6-week old female *Fgfr2*-cKO and control (Ctrl,  $AS^{Cre/+};R26R^{mTmG/+}$ ) mice. White dashed box demarcates region enlarged to the right. (C) Quantification of GFP+ cells as a proportion of total adrenocortical cells in the zG and zF from 6-10-week-old male and female control (Ctrl) and *Fgfr2*-cKO (cKO) mice. Adrenals from male mice are represented with black dots; adrenals from female mice are represented with magenta dots. Student's t-test, \*\*\*  $p < 0.001$ , \*\*\*\*  $p < 0.0001$ , N=7, 5 mice. (D) Representative lineage-tracing by immunofluorescence for GFP+ cells (green) and co-staining with DAB2 (red) in adrenals from adult 12-week-old male Ctrl and *Fgfr2*-cKO mice. (E) Representative images of GFP (Green) and Ki67 (Magenta) immunostaining in adrenals from adult 12-week-old male Ctrl and *Fgfr2*-cKO mice. White arrowheads point to GFP and Ki67 co-positive cells. (F) Representative images of DAB2 (red) immunostaining in adrenals from adult male *Fgfr2*-cKO and Ctrl mice. (G) Representative bright-field images of *in situ* hybridization (RNAscope) of *Cyp11b2* (brown) in adrenals from adult male mice. Nuclei are stained with hematoxylin. (H) *Fgfr2* expression (qRT-PCR) in male and female adrenals from wild-type adult C57BL/6 mice. Student's t-test, \*\*\*\*  $p < 0.0001$ , N=5, 5 mice. All immunostaining: Scale Bars, 50 $\mu$ m. DAPI (blue), nuclei. Dashed lines correspond to the zG-zF boundary.

## Supplemental Figure 2

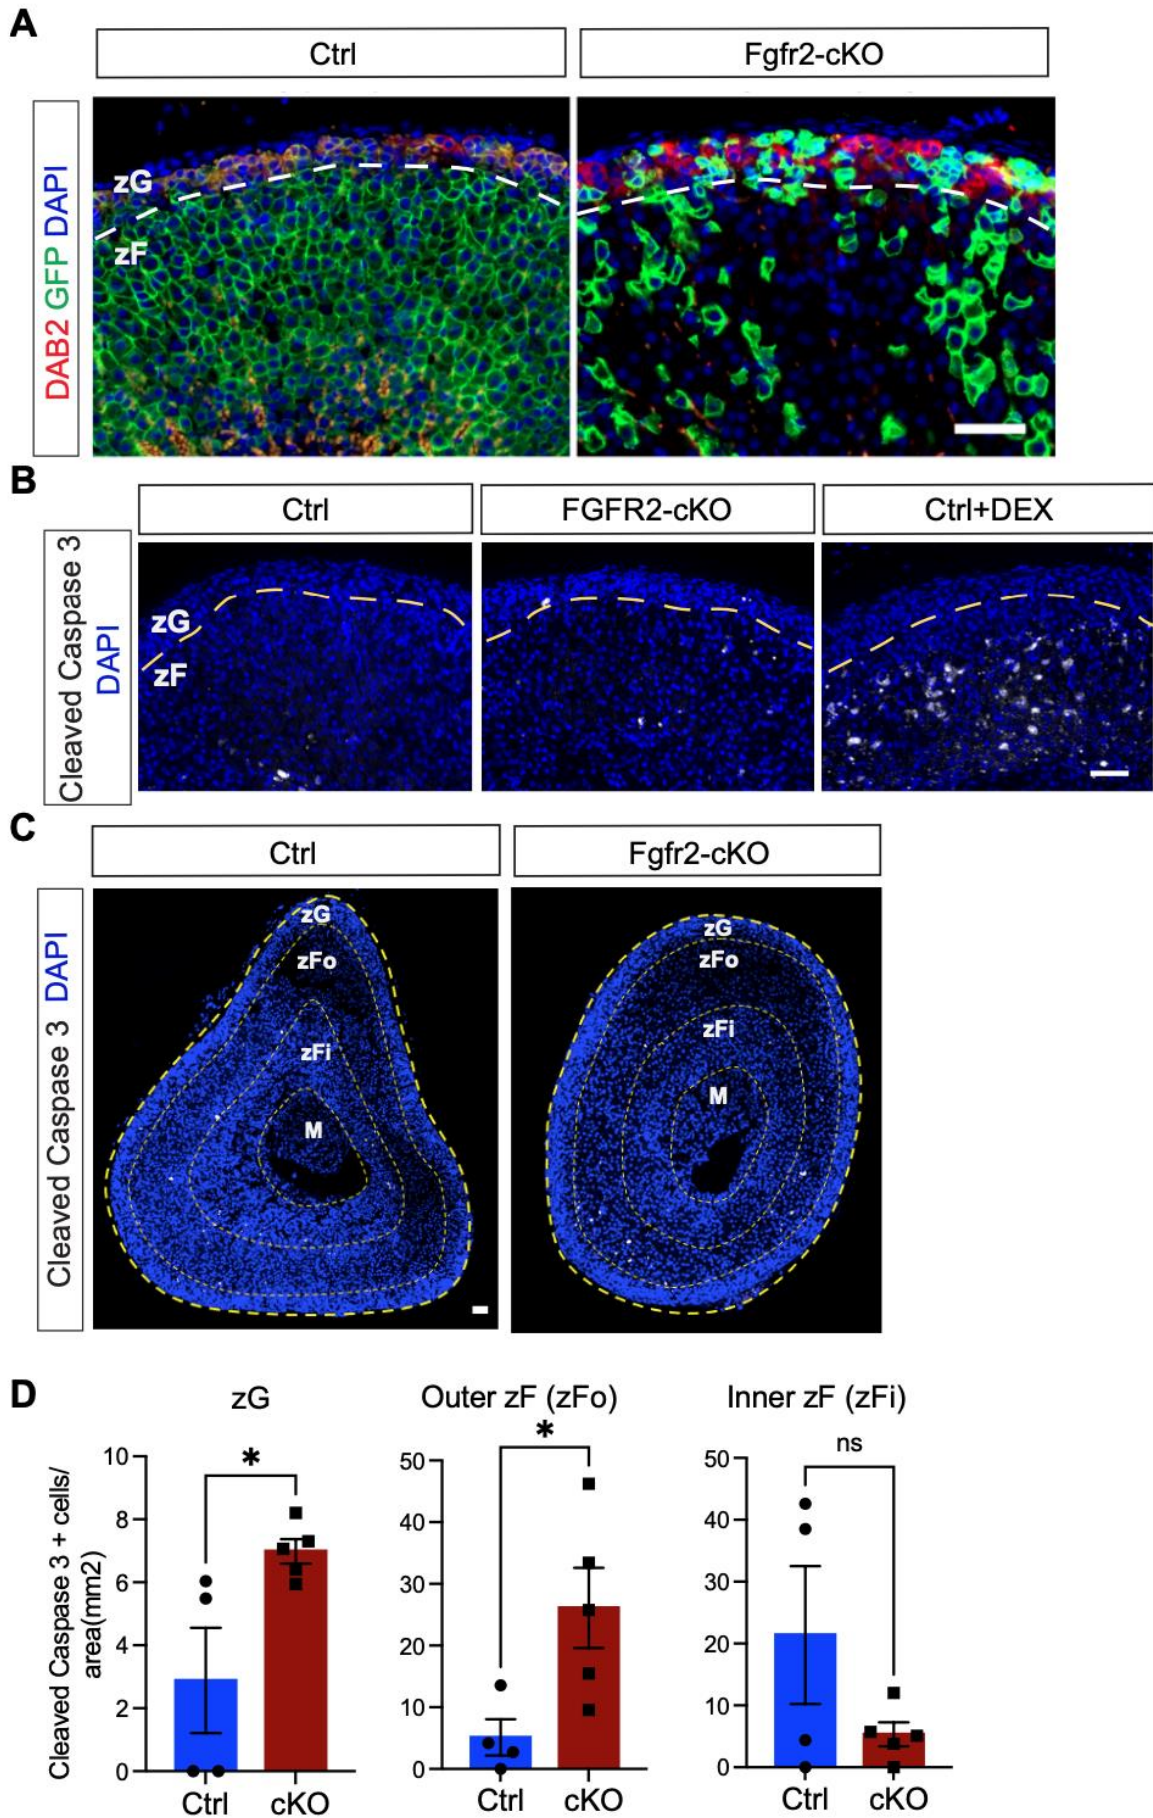

**Supplemental Figure 2 (Supplemental to Figure 1): Apoptosis assessment in Fgfr2-cKO mice and adrenal morphology in aged animals.** (A) Representative images of GFP (Green) and DAB2 (Red) immunostaining in adrenals from aged Ctrl (8 months) and Fgfr2-cKO (18-20 months) female mice. Dashed lines correspond to the zG-zF boundary. (B) Representative images of cleaved caspase 3 immunostaining (grey) in adrenals from Ctrl and Fgfr2-cKO male mice (14-18 weeks), and dexamethasone-treated male mice shown as a positive control. Dashed line corresponds to the zG-zF boundary. (C,D) Representative images (C) and spatial quantification (D) of cleaved Caspase 3+ cells in whole adrenals from Ctrl and Fgfr2-cKO female mice. Dashed lines define borders of the zG, outer zF (zFo), inner zF (zFi), and medulla (M). Student's t-test, \* $p < 0.05$ , ns: not significant, N=4,5 mice. All immunostaining: Scale Bars, 50 $\mu$ m. DAPI (blue), nuclei.

### Supplemental Figure 3

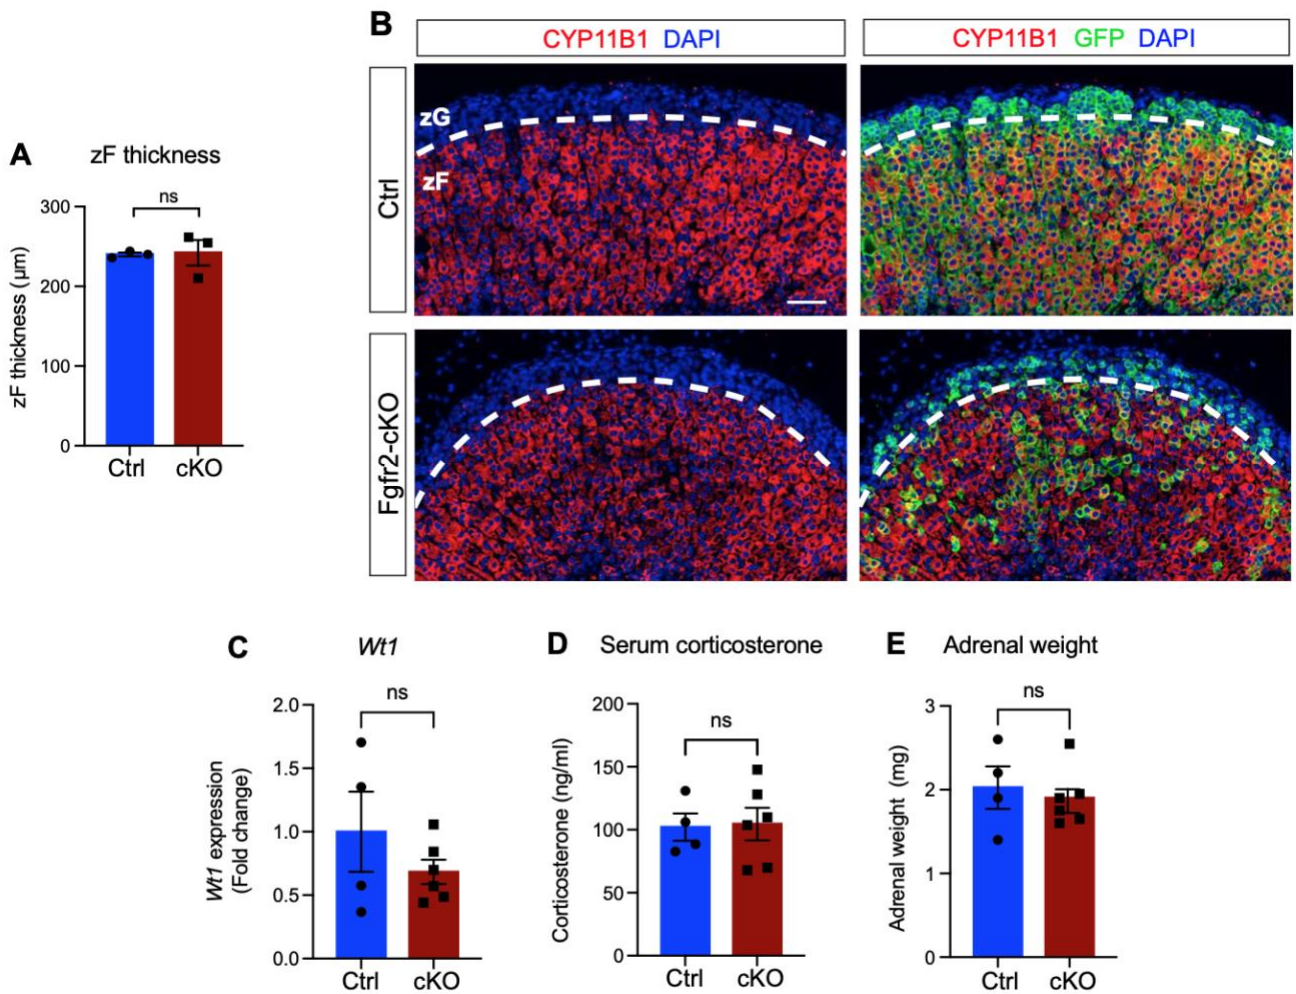

#### Supplemental Figure 3 (Supplemental to Figure 1): zF morphology and function in Fgfr2-cKO mice.

(A) zF thickness in adrenals from female control (Ctrl) and Fgfr2-cKO (cKO) mice (20-24 weeks). Student's t-test, ns: not significant, N=3, 3 mice. (B) Representative images of GFP (green) and CYP11B1 (red) co-immunostaining of control (Ctrl) and Fgfr2-cKO (cKO) adrenals from adult female mice. Scale Bar, 50µm. DAPI (blue), nuclei. White dashed line corresponds to the zG-zF boundary. (C) mRNA expression (qRT-PCR) levels of *Wt1* (Wilms Tumor suppressor gene 1), assessed in adrenals from male Ctrl and Fgfr2-cKO (cKO) mice (12 weeks). Student's t-test, ns: not significant, N=4, 6 mice (D) Serum corticosterone levels in male Ctrl and Fgfr2-cKO (cKO) mice (12 weeks). Student's t-test, ns: not significant, N=4, 6 mice. (E) Adrenal weight in male Ctrl and Fgfr2-cKO (cKO) mice (12 weeks). Student's t-test, ns: not significant, N=4, 6 mice

# Supplemental Figure 4

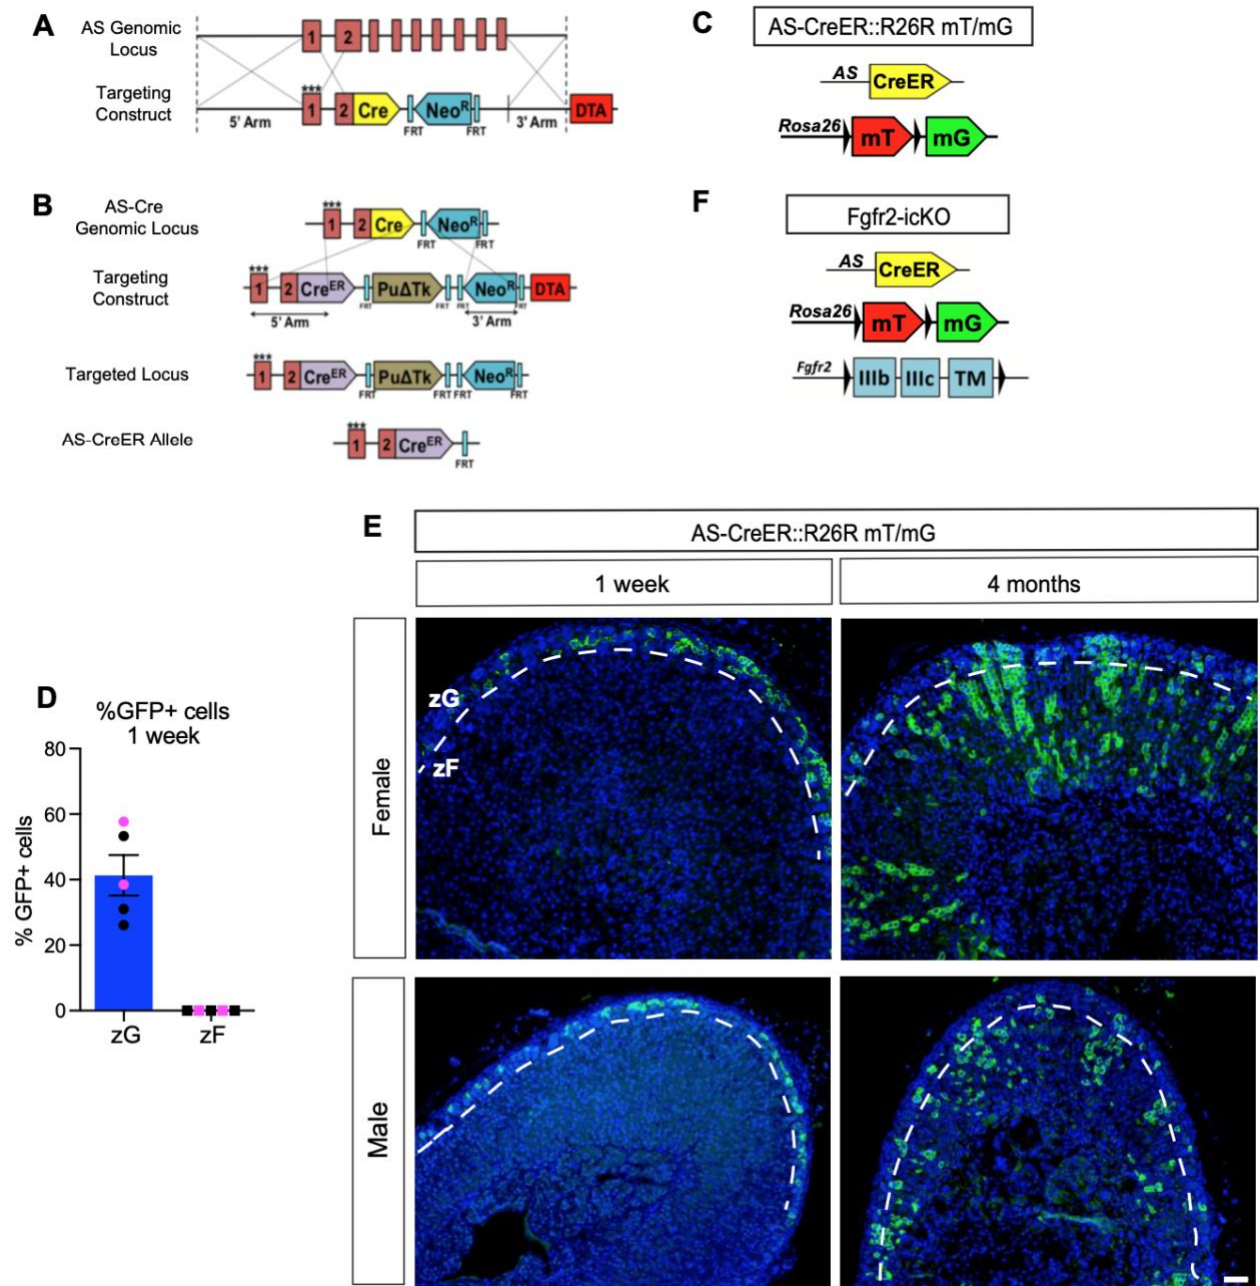

**Supplemental Figure 4 (Supplemental to Figure 2): Introduction and characterisation of the**

**tamoxifen-inducible AS-Cre mouse model (AS-CreER).** (A) Schematic showing the endogenous AS genomic locus and the targeting construct employed to generate the original  $AS^{Cre}$  mice with 5' and 3' homologous targeting arms, a FRT-flanked neomycin resistance cassette (NeoR) for positive selection and a Diphtheria toxin subunit A (DTA) cassette for negative selection. All translation start sites (ATG) within exon 1 or 2 were excluded from the construct or mutated, as indicated by the three asterisks above exon 1. (B) Schematic showing the targeting strategy used to generate tamoxifen-inducible  $AS^{CreER}$  mice by retargeting the  $AS^{Cre}$  locus in the embryonic stem cell line used to generate  $AS^{Cre}$  mice. The targeting construct consists of a 5' homology arm containing exon 1 and part of exon 2 of the AS allele followed by the  $Cre^{ERT2}$  coding sequence (denoted in the schematic as  $Cre^{ER}$ ), a FRT-flanked puromycin positive selection cassette (Pu $\Delta$ Tk) and a 3' homology arm containing an FRT-flanked neomycin resistance cassette as well as and a Diphtheria toxin subunit A (DTA) cassette for negative selection. (C) Schematic of tamoxifen-inducible  $AS^{CreER/+};R26R^{mTmG/+}$  model (AS-CreER::R26R mT/mG). (D) Fractional GFP expression in the zG and zF of AS-CreER::R26R mT/mG mice 1 week post tamoxifen induction. Adrenals from male mice are represented with black dots; adrenals from female mice are represented with magenta dots. (E) Representative images of lineage-tracing by immunofluorescence for GFP+ cells (green) in adrenals from adult male and female AS-CreER::R26R mT/mG mice one week and four months post tamoxifen administration (tamoxifen administered at six weeks of age). Scale Bar, 50 $\mu$ m. DAPI (blue), nuclei. White dashed line corresponds to the zG-zF boundary. (F) Schematic of the tamoxifen-inducible Fgfr2-icKO ( $AS^{CreER/+};Fgfr2^{fl/fl};R26R^{mTmG/+}$ ) model.

## Supplemental Figure 5

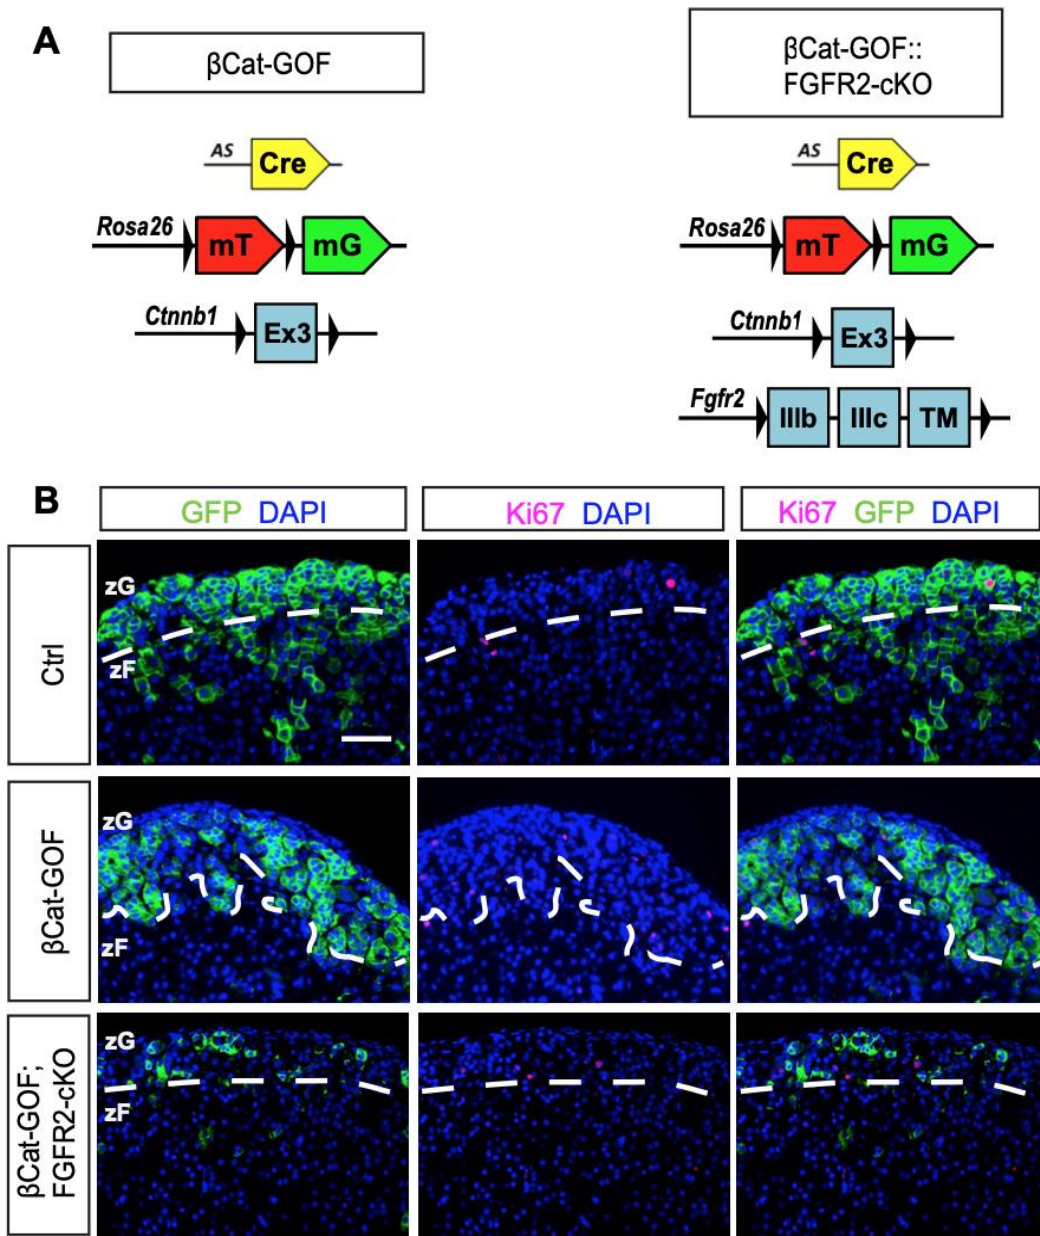

**Supplemental Figure 5 (Supplemental to Figure 3): zG cell proliferation is unchanged in Control,**

**$\beta$ Cat-GOF and  $\beta$ Cat-GOF; Fgfr2-cKO mice. (A) Schematic of the  $\beta$ Cat-GOF**

**( $AS^{Cre/+}::R26R^{mTmG/+}::Ctnnb1^{ex3/+}$ ), and  $\beta$ Cat-GOF::Fgfr2-cKO ( $AS^{Cre/+}::R26R^{mTmG/+}::Ctnnb1^{ex3/+}::Fgfr2^{fl/fl}$ )**

**models. (B) Representative images of GFP (green) and Ki67 (magenta) immunostaining of control (Ctrl,**

**$AS^{Cre/+}::R26R^{mTmG}$ ),  $\beta$ Cat-GOF and  $\beta$ Cat-GOF::Fgfr2-cKO adrenals (adult mice aged 6-10 weeks). Scale**

**Bar, 50 $\mu$ m. DAPI (blue), nuclei. White dashed line corresponds to the zG-zF boundary. (C) Quantification of**

**Ki67+ cells in the zG from male and female Ctrl,  $\beta$ Cat-GOF and  $\beta$ Cat-GOF::Fgfr2-cKO mice. Adrenals from**

**male mice are represented with black data points; adrenals from female mice are represented with**

**magenta data points. One-way ANOVA, P=0.56, ns: not significant.**

## Supplemental Figure 6

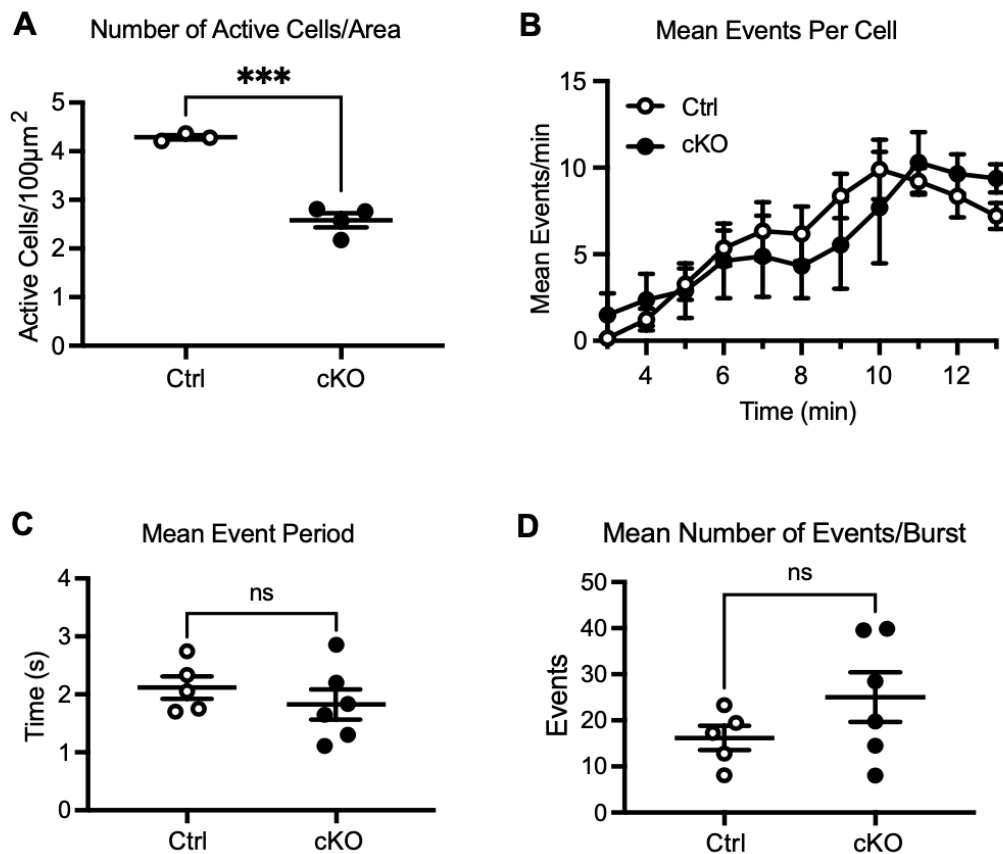

**Supplemental Figure 6: Calcium imaging in Fgfr2-cKO adrenals using the GCaMP6 calcium reporter system.** (A) Number of active cells per 100  $\mu\text{m}^2$  of zG in Ctrl and Fgfr2-cKO adrenal slices from 7-12 weeks old mice, recorded from 3-11 min after stimulation with 300 pM Ang II. Student's t-test, \*\*\* $p < 0.001$ ,  $N = 5$ , 4 per group. (B) Mean number of events (calcium oscillations) elicited by 300pM Ang II added to the media at 1.5 minutes per active cell binned in 1-minute intervals. (C) Mean event period and (D) mean number of events/calcium burst. (B-D) Data presented as mean of active cells analysed for each mouse (circle). Nested t-test,  $N = 5$ , 6.

# Supplemental Figure 7

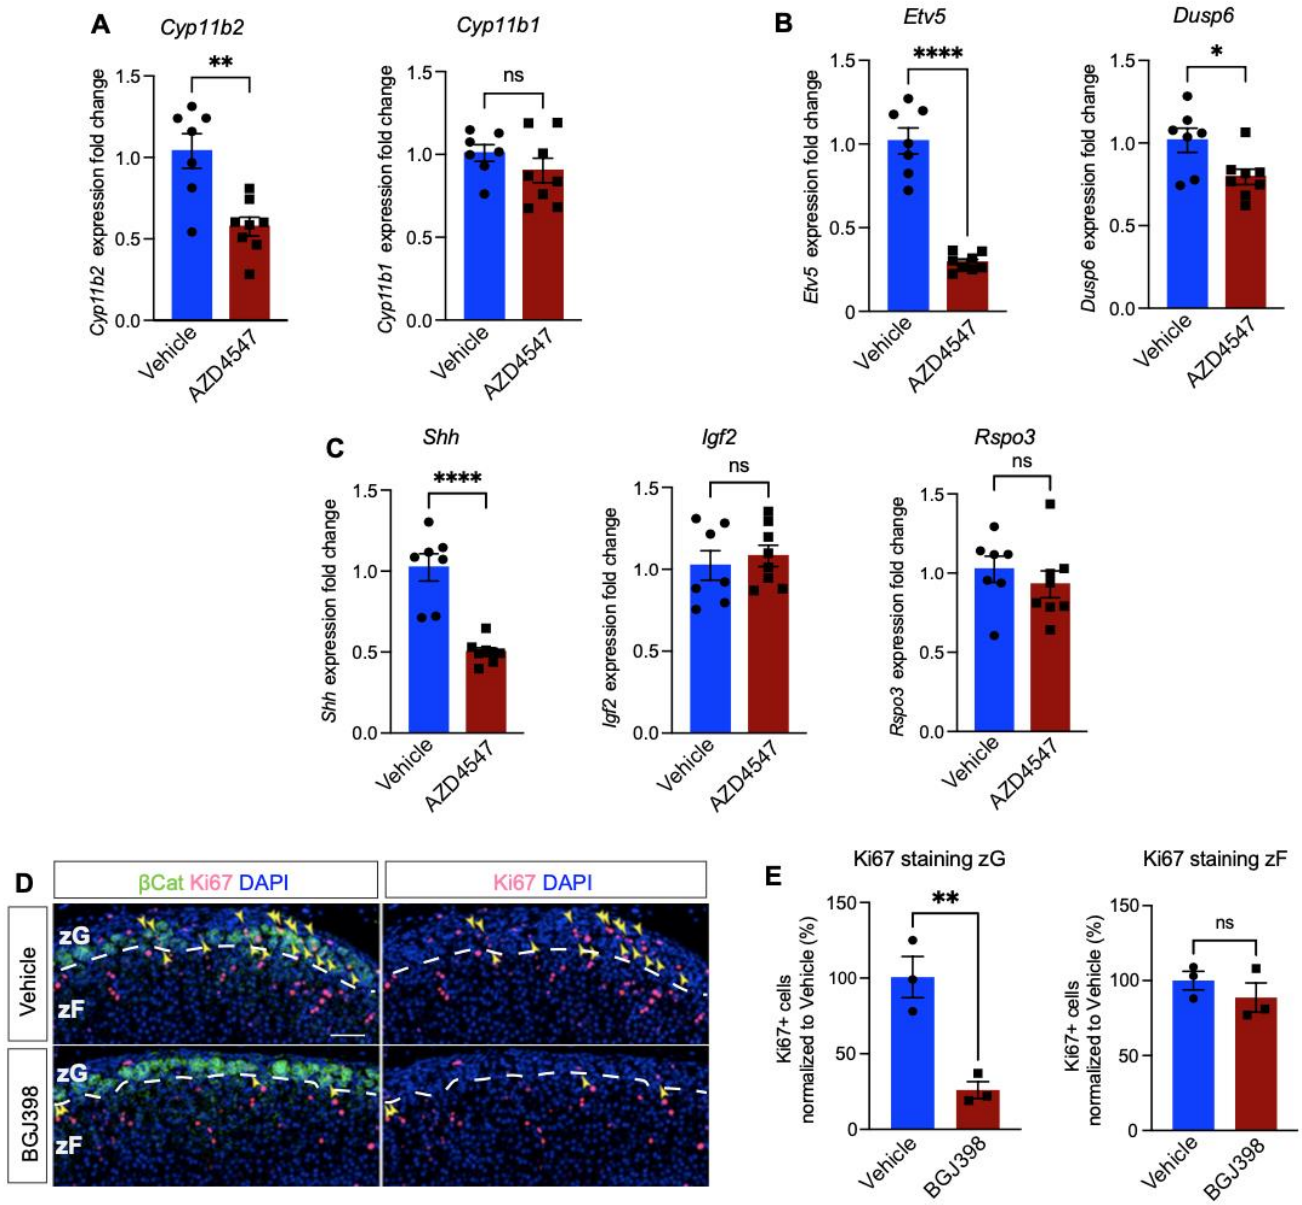

**Supplemental Figure 7 (Supplemental to Figure 4): Pharmacological FGFR inhibition impedes zG cell proliferation. (A-B)** mRNA expression levels (qRT-PCR) of zG and zF markers *Cyp11b2* and *Cyp11b1*, respectively (A) and downstream FGFR2 targets *Etv5* and *Dusp6* (B) in adrenals from male C57BL/6J mice (7-8 weeks) treated with 10 mg/kg/day AZD4547 or vehicle. Student's t-test, N=7, 8 mice. **(C)** mRNA expression (qRT-PCR) levels of *Shh*, *Rspo3* and *Igf2* in adrenals from adult male C57BL/6J mice (7-8 weeks) treated with 10 mg/kg/day of AZD4547 or vehicle by oral gavage. Student's t-test: \*\*\*\*p<0.0001, ns: not significant, N=7,8. **(D)** Representative images of Ki67 (magenta) and  $\beta$ -Catenin (a zG marker, green) immunostaining in male C57BL/6J male mice (12 weeks) treated with 10 mg/kg/day BGJ398 or vehicle (Veh) for 12 days by oral gavage. Yellow arrowheads indicate Ki67+ cells in the zG. Scale Bars, 50 $\mu$ m. DAPI (blue), nuclei. White dashed line corresponds to the zG-zF boundary. **(E)** Quantification of Ki67+ cells in the zG and the zF of BGJ398 and vehicle-treated mice. Student's t-test, \*\* p < 0.01, ns: not significant, N=3, 3 mice.

**Supplemental Table 1.** Taqman probes used for qRT-PCR

| Gene Name      | Taqman Probe  |
|----------------|---------------|
| <i>Actb</i>    | Mm02619580    |
| <i>Cyp11b1</i> | Mm01204952_m1 |
| <i>Cyp11b2</i> | Mm01204955_g1 |
| <i>Etv5</i>    | Mm00465816_m1 |
| <i>Dusp6</i>   | Mm00518185_m1 |
| <i>Hprt</i>    | Mm03024075_m1 |
| <i>Igf2</i>    | Mm00439564_m1 |
| <i>Ren</i>     | Mm02342887_mH |
| <i>Rspo3</i>   | Mm01188251_m1 |
| <i>Shh</i>     | Mm0436528_m1  |
| <i>Wt1</i>     | Mm01337048    |
